# Supplementary material for: Counter-rotating eddy pair in the Luzon Strait
Source: Copernicus journal article supplement (doi:10.5194/os-2021-116), 2022-01-20
Supplement: Supplementary file [file os-2021-116-AC1-supplement.zip]

Dear reviewer

Thank you very much for your effort and time to review our manuscript. Your comments and suggestions are very valuable and will be very helpful to improve our manuscript. We have revised the manuscript according to your comments and suggestions. Here is a point-to-point reply. The manuscript has been polished again by a professional polishing company (LetPub, [www.letpub.com](http://www.letpub.com)).

**Question1**, “The Introduction is lengthy, and presented in a way like it is irrelevant to the study. Discussing the results of some works on the Luzon Strait without explaining how this study complements and/or extends these works, and how the previous results are related to the study looks like it is unimportant for the authors to highlight the position of their work in the state of the art. I would recommend to take the opposite approach.”

**Answer:** Thanks. We have made a lot of changes to the introduction in order to shorten the introduction and to emphasize the connection between this study and previous studies, and its importance in this field, which has been highlighted in the introduction of the revised manuscript. We would like to pick several important parts to explain these changes: (1) We give the connection between this study and previous studies from line 52 to line 57. They show that previous studies have studied eddies-eddies interaction phenomenon in the vicinity of the Luzon Strait, however, it is unclear whether this phenomenon of mesoscale eddies-eddies interaction can occur on the east and west sides of the Luzon Strait and plays an important role in the material and energy exchange between the SCS and the NWP. Therefore, our study extends previous studies; (2) We give the importance of our study from line 63 to line 66. They show that our study first propose the counter-rotating eddy pair phenomenon in the Luzon Strait and creates a new form of material and energy exchange between the SCS and the NWP, which would supplement and perfect the theory of material and energy exchange between the SCS and the NWP.

**Question2**, “The motivation behind the work is unclear. The reader might think of the counter-rotating eddy pair as being a local phenomenon of minor importance. The authors should discuss why they study the counter-rotating eddy pair, why this study is important, and how it contributes to the state of the art.”

**Answer:** Thanks. We have added a description of research motivation in the introduction from line 55 to line 57. Our research motivation is to study that whether this phenomenon of mesoscale eddies-eddies interaction can occur on the east and west sides of the Luzon Strait and play an important role in the material and energy exchange between the SCS and the NWP. The importance and contribution of our studies have been given from line 63 to line 66 and from line 395 to line 397 of the revised manuscript.

**Question3,** “The English language has to be improved. In many places, the authors should use Present Indefinite instead of Past Simple (see, e.g. L14-20).”

**Answer:** We have changed Present Indefinite into Past Simple in many places which have been highlighted in the revised manuscript. The manuscript has also been polished again by LetPub company ([www.letpub.com](http://www.letpub.com)).

**Question4,** “Remove all web-links from the text and put them in the References”

**Answer:** We have removed all web-links from the text and put them in the References, which have been highlighted from line 431 to line 432, from line 444 to line 446, from line 458 to line 459 and in line 433 of the revised manuscript. The format of references will be revised according to the requirements of this journal.

**Question5,** “Explain how the eddies in Figure 2 as well as the counter-rotating pair have been extracted from data, otherwise it feels like you take a neighbourhood around some local extrema.”

**Answer:** Sorry. Since we have made a lot of changes to the introduction, the original Figure 2 is no longer needed. We have deleted the original Figure 2.

**Question6,** “Some figures show fields without explaining whether it is a snapshot, time-mean, or some-thing else; see, e.g. Figures 1 and 3.”

**Answer:** Thanks. We have added a description of time state in the captions of the Figures 1 and 2 (the original Figure 3), which has been highlighted from line 71 to line 72 and from Line 78 to line 79 in the revised manuscript.

**Question7**, “Provide a colorbar and units for Figure 2.”

**Answer:** Sorry. Since we have made a lot of changes to the introduction, the original Figure 2 is no longer needed. We have deleted the original Figure 2.

**Question8**, “L109: ... to present, ... What is present? Be specific.”

**Answer:** We have defined the time span of the data and highlighted it in line 90 of the revised manuscript.

**Question9**, “L121: The wind data was provided by the NCDC. What is the rationale for referring to (Zhang et al., 2006) in line 125?”

**Answer:** Zhang et al. (2006) specifically introduced the wind data provided by the NCDC in this reference, so we set it as a reference. If it's not necessary, we can remove it.

**Question10**, “L150: ”The overbar denotes time averaged” → ”The overbar denotes a time average (or a time mean) over 70 days”. Adjust the following text accordingly.”

**Answer:** Thanks. We have revised and highlighted it in line 126 and adjust the following text in the revised manuscript.

**Question11**, “Explain in detail how you calculated the period of the counter-rotating eddy pair. Did you extract it from the Fourier analysis of the SSHA time series?”

**Answer:** From Figure 6 and Figure 8 in the revised manuscript, we can see that the counter-rotating eddy pair phenomenon occurs, develops and disappears from  $t = -36$  to  $t = 36$ , which is about 70 days. We have made some attempts to set the period between 65-80 days, and they will not affect our basic conclusion. Therefore, we define this period as about 70 days, which has been highlighted from line 128 to line 131 of the revised manuscript. We also analyzed the power spectrum of this SSHA time series and found that the significant period was about 74 days.

**Question12**, “One reference in line 135 is enough, remove Zhang et al., 2015; Zhang et al., 2017.”

**Answer:** We have removed “Zhang et al., 2015; Zhang et al., 2017.” In line 114 of the

revised manuscript.

**Question13**, “Explicitly define deviations (the primes) in (1)-(3)”

**Answer:** The primes denote deviations from the average value of 35 days before and after this day, which has been highlighted from line 126 to line 127 of the revised manuscript.

**Question14**, “L144: ”Where“ → ”where””

**Answer:** Thanks, we have revised and highlighted it in line 120 of the revised manuscript.

**Question15**, “Give a reference for (4)”

**Answer:** We have added two references, which are highlighted in line 136 of the revised manuscript.

**Question16**, “L159: ”Where“ → ”where””

**Answer:** We have revised and highlighted it in line 137 of the revised manuscript.

**Question17**, “Do not define the variables in (4) that have already been defined above.”

**Answer:** We have removed the defined variables in (4) that have already been defined above, And added a description in line 139 of the revised manuscript.

**Question18**, “All the constants in (1)-(4) have to be defined, give the values used in the study.”

**Answer:**  $\rho_0, v$  are the constants in the formula (1-4). We have given their values used in the study, which has been highlighted in line 122 and line 138, respectively, of the revised manuscript.

**Question19**, “Provide a formula for the calculation of time series of the SSHA.”

**Answer:** We have provided a formula for the calculation of time series of the SSHA from line 146 to line 150 and highlighted them in the revised manuscript.

**Question20**, “L183:Remove ”in order to obtain a time series”. ”

**Answer:** We have removed “in order to obtain a time series” in the revised manuscript.

**Question21**, “Are Figs.4(b)-(c) an average over the positive and negative intensity index, respectively?”

**Answer:** Yes, you are right. The original Figure 4(b)-(c) is the Figure 3(b)-(c) of the revised manuscript. We have highlighted it from line 177 to line 178 in the revised manuscript.

**Question22**, “What do you mean by “We counted the temporal distribution of the positive and negative intensity index values.”?”

**Answer:** We intended to make statistics on the occurrence time of positive intensity index and negative intensity index. We have further clarified our intention from line 180 to line 181 in the revised manuscript.

**Question23**, “Explain how you compute RV and RVA in Figs. 8 and 15, respectively.”

**Answer:** The original Fig. 8 is the Fig.7 of the revised manuscript. We take Figure 7a in the revised manuscript as an example to explain how we compute RV: we first compose SSHA of the time when the AE mode of the counter-rotating eddy pair reached the pinnacle, which is shown in the Figure 3a. Then we give the SSHA from  $t = -40$  to  $t = 36$  at an interval of 4 days, which is shown in the Figure 6. We calculate the relative vorticity (RV) corresponding to different time points from  $t = -40$  to  $t = 36$  in the Figure 6, in which the spatial calculation range of RV is the red boxes in the east and west of the Figure 2. Thus, we get the RV time series in the Figure 7a.

The original Figure 15 is the Figure 14 of the revised manuscript. We take Figure 14a in the revised manuscript as an example to explain how we compute RVA: the acquisition method of the RVA time series in Figure 14a is the same as the one of the RV time series in Figure 7a, where RVA in Figure 14a refers to the RV minus its climate state average.

**Question24**, “Remove produce in line 206.”

**Answer:** Thanks. We have removed it in line 190 of the revised manuscript.

**Question25**, “Remove “However” in line 382.”

**Answer:** Thanks. We have removed it in line 376 of the revised manuscript.

We thank you again for your constructive comments!
